# Supplementary material
Source: PubMed Central journal article supplement (PMC547855)

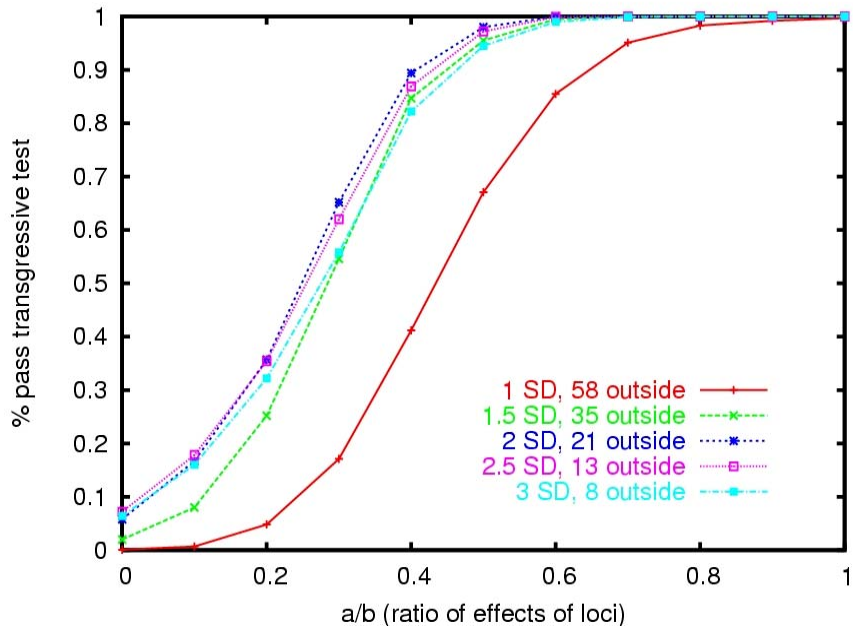

Supplement: pnas_102_5_1572__2.pdf [file pnas_102_5_1572__2.pdf]

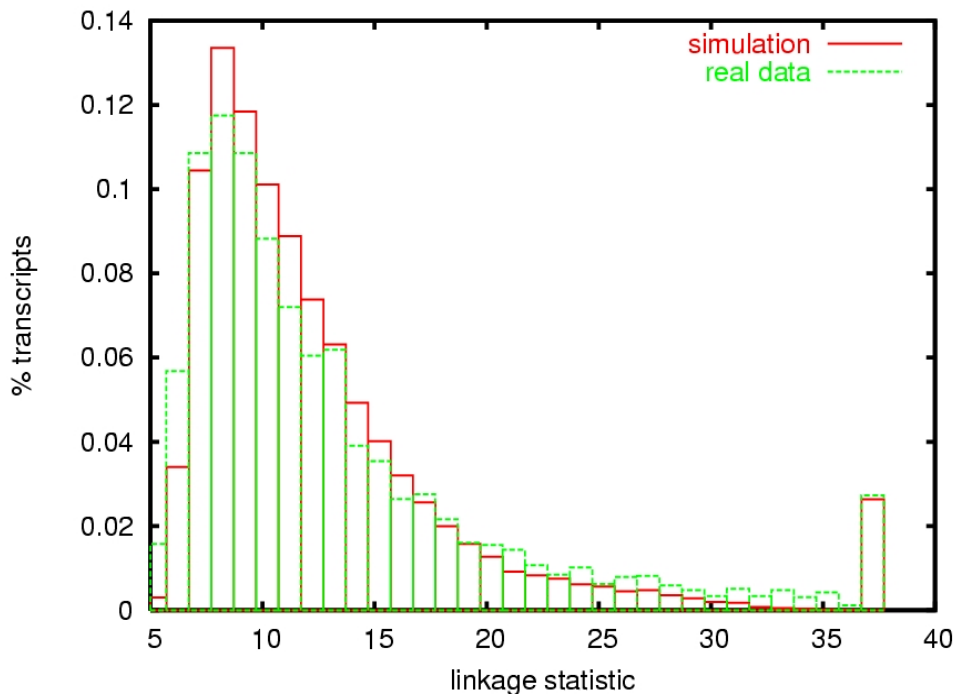

Supplement: pnas_102_5_1572__3.pdf [file pnas_102_5_1572__3.pdf]
